# Supplementary material
Source: Springer Nature journal article supplement (https://www.springermedizin.de/resource/supplementary/13256_2013_3161_MOESM7_ESM.pdf/9650014)

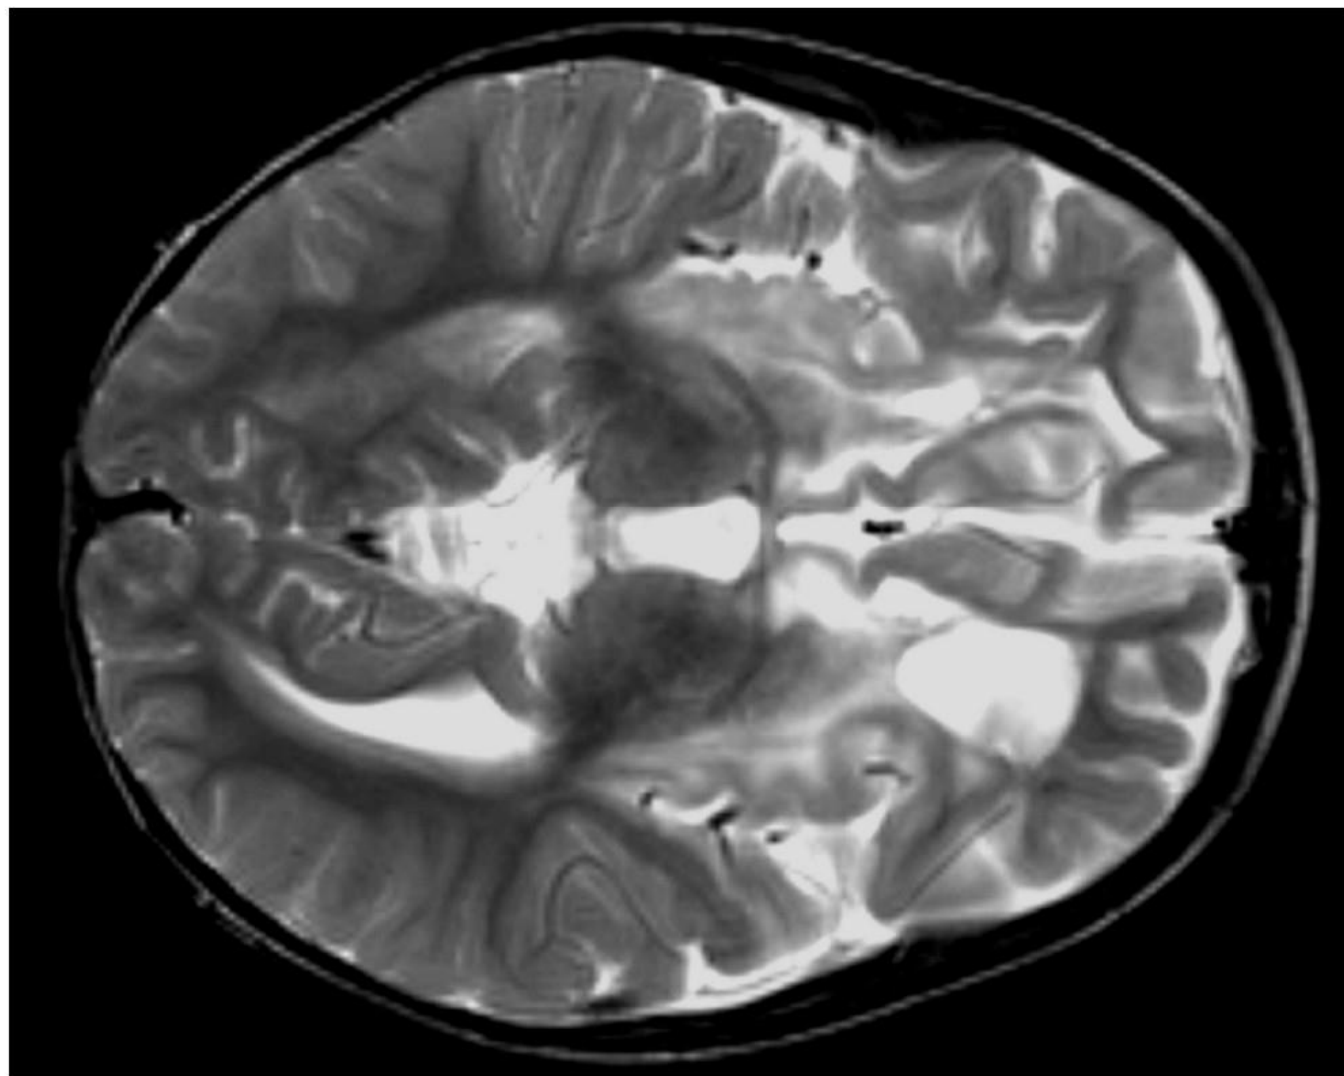

Supplement: MOESM7 [file 9650014]
